# Supplementary material for: Origin and Evolution of TRIM Proteins: New Insights from the Complete TRIM Repertoire of Zebrafish and Pufferfish
Source: PLoS One. 2011 Jul 15;6(7):e22022. doi: 10.1371/journal.pone.0022022 (PMC3137616; doi:10.1371/journal.pone.0022022)
Supplement: Figure S2 — A table listing the trim genes of pufferfish, with annotations and genomic locations. (XLS) [file pone.0022022.s002.xls]

## Sheet: Feuil1
Figure S2
trim member	structure	Tetraodon Ensembl Gene ID	Tetraodon Ensembl Protein ID	Tetraodon Chromosome	Tetraodon Chromosome Start (bp)	Tetraodon Chromosome End (bp)
Class CI	RBCC-COS-FN-B302
trim1	RBCC-COS-FN-B302	ENSTNIG00000016779	ENSTNIP00000002115	1	7885241	7930357
trim9	RBCC-COS-FN-B302	ENSTNIG00000019329	ENSTNIP00000022531	10	11649370	11665381
trim18a (mid1)	RBCC-COS-FN-B302	ENSTNIG00000013963	ENSTNIP00000016970	2	12739218	12748190
trim18b (mid1)	RBCC-COS-FN-B302	ENSTNIG00000014550	ENSTNIP00000017575	3	5326113	5340625
trim36	RBCC-COS-FN-B302	ENSTNIG00000003198	ENSTNIP00000005778	12	7819843	7835425
trim46a	RBCC-COS-FN-B302	ENSTNIG00000018326	ENSTNIP00000021494	8	8090506	8095553
trim46b	RBCC-COS-FN-B302	ENSTNIG00000017557	ENSTNIP00000020702	21_random	2201451	2210143
trim67	RBCC-COS-FN-B302	ENSTNIG00000019160	ENSTNIP00000022357	14	1514873	1531585
trim76	.. BCC-..-FN-B302	ENSTNIG00000015411	ENSTNIP00000018479	12	2891748	2897824
Class CII	RBCC-COS
trim54	RBCC-COS	ENSTNIG00000005428	ENSTNIP00000008116	14	9500637	9505434
trim55a	RBCC-COS	ENSTNIG00000004908	ENSTNIP00000007572	15_random	124026	126009
trim55b	RBCC-COS	ENSTNIG00000004027	ENSTNIP00000006637	6	3401260	3403497
trim63	RBCC-COS	ENSTNIG00000017841	ENSTNIP00000021000	2	20969212	20970397
trim101	RBCC-COS-TM	only in fugu : ENSTRUG00000004226
Class CIII	RBCC-COS-FN
trim42	not found	not found
Class CiV	RBCC-B302
trim4	RBCC ..	not found
trim5	not found	not found
trim6	not found	not found
trim10	not found	not found
trim11	not found	not found
trim15	not found	not found
trim16	..BCC-B302	ENSTNIG00000011869	ENSTNIP00000014826	2	2178265	2183174
trim17	not found	not found
trim21	not found	not found
trim22	not found	not found
trim25	RBCC-B302	only in fugu (ENSTRUG00000002882)
trim25l	not found	not found
trim26	not found	not found
trim27	not found	not found
trim34	not found	not found
trim35	RBCC-B302	& many see below
trim38	not found
trim39	RBCC-B302	& many (btr) see below
trim41	not found
trim43	not found	not found
trim47	RCC-B302	ENSTNIG00000008987	ENSTNIP00000011841	1	2127830	2130572
trim60	not found	not found
trim62	RBCC-B302	ENSTNIG00000014788	ENSTNIP00000017826	11	4991685	5006881
trim64	not found	not found
trim68	not found	not found
in fish only
trim103	..-B302	ENSTNIG00000007941	ENSTNIP00000010762	15	2221394	2223709
trim104	.. BCC-B302	ENSTNIG00000009024	ENSTNIP00000011880	4	2803801	2806419
trim105	R..CC-B302	ENSTNIG00000009934	ENSTNIP00000012826	7	3514412	3517205
trim106	not found	not found
trim107	not found	orthologs in medaka ( ENSORLG00000016651) and stickleback ( ENSGACG00000008188) only
trim108	not found	not found
trim109	not found	not found
trim110	RBCC-B302	ENSTNIG00000007933	ENSTNIP00000010753	15	2276901	2279327
ftr	RBCC-B302	& many (ftr) see below
Class V	RBCC
trim8	RBCC	ENSTNIG00000004343	ENSTNIP00000006976	2	214272	218904
trim13	not found	not found
trim19	not found	not found
trim31	not found	not found
trim40	not found	not found
trim56	not found	not found
trim59	RBCC	ENSTNIG00000007708	ENSTNIP00000010525	16	2079207	2080401
Class VI	RBCC-PhD-bromo
trim24	RBCC-PhD-bromo	ENSTNIG00000006789	ENSTNIP00000009576	19	5372408	5378114
trim28	not found	not found
trim33likea	.. -PhD-Bromo	ENSTNIG00000004197	ENSTNIP00000006820	Un_random	67496620	67508129
trim33likeb	RBB	ENSTNIG00000005508
trim102	not found
Class VII	RBCC-Ig/Filamin-NHL
trim2	RBCC-fil-NHL	ENSTNIG00000007110	ENSTNIP00000009911	18	8986378	8990575
trim2likea	.. BCC-fil-NHL	ENSTNIG00000003107	ENSTNIP00000005679	Un_random	56693052	56695918
trim2likeb	.. BCC-fil-NHL	ENSTNIG00000003108	ENSTNIP00000005680	Un_random	56706850	56709710
trim3a	RBCC-Fil-NHL	ENSTNIG00000016272	ENSTNIP00000019366	16	4941921	4945793
trim3b	RBCC-Fil-NHL	ENSTNIG00000009935	ENSTNIP00000012827	7	3521219	3527409
trim32	RBCC-..-NHL	ENSTNIG00000018740	ENSTNIP00000021919	4	8077197	8079218
trim45	RBCC-Fil-..	ENSTNIG00000015656	ENSTNIP00000018732	2	19808150	19811373
trim71	RBCC-fil-NHL	ENSTNIG00000009249	ENSTNIP00000012114	21	4323351	4338124
Class VIII	RBCC-MATH
trim37	RBCC-MATH	ENSTNIG00000007654	ENSTNIP00000010469	7	10,731,337	10,736,888
Class IX	RBCC-ARF
trim23	RBCC-ARF	ENSTNIG00000013490	ENSTNIP00000016485	4	4452113	4454575
Other orthologs to human trims
trim14	not found
trim20	..BCC-B302	ENSTNIG00000009781	ENSTNIP00000012668	3	10863562	10866855
trim29	not found
trim44	..BCC	ENSTNIG00000011378	ENSTNIP00000014323	13	5963494	5969898
trim48	not found
trim49	not found
trim51	not found
trim52	not found
trim58	not found
trim61	not found
trim66	..BCC-phDBromo	ENSTNIG00000000247	ENSTNIP00000003156	6	6521196	6529826
trim35
trim35	RBCC-B302	ENSTNIG00000011519	ENSTNIP00000014469	2	4114222	4116779
trim35	RBCC-B302	ENSTNIG00000010440	ENSTNIP00000013347	3	11307275	11309119
trim35	RBCC-B302	ENSTNIG00000010448	ENSTNIP00000013356	3	11352792	11354819
trim35	RBCC-B302	ENSTNIG00000009101	ENSTNIP00000011960	4	1725958	1728361
trim35	RBCC-B302	ENSTNIG00000006555	ENSTNIP00000009329	Un_random	87254278	87256773
trim35	RBCC-B302	ENSTNIG00000006562	ENSTNIP00000009336	Un_random	16754093	16755434
btr/trim39
btr	RBCC-B302	ENSTNIG00000013934	ENSTNIP00000016939	2	12110170	12111561
btr	RBCC-B302	ENSTNIG00000010436	ENSTNIP00000013343	3	11248603	11250317
btr	RBCC-B302	ENSTNIG00000006492	ENSTNIP00000009261	3	15290610	15298728
btr	RBCC-B302	ENSTNIG00000018719	ENSTNIP00000021898	19	647057	658308
btr	RBCC-B302	ENSTNIG00000003683	ENSTNIP00000006280	Un_random	60860812	60862929
btr	RBCC-B302	ENSTNIG00000005497	ENSTNIP00000008192	Un_random	17527104	17531155
btr	RBCC-B302	ENSTNIG00000007025	ENSTNIP00000009825	Un_random	632159	635023
btr	RBCC-B302	ENSTNIG00000007419	ENSTNIP00000010225	Un_random	1805893	1816492
btr	RBCC-B302	ENSTNIG00000007420	ENSTNIP00000010226	Un_random	1800650	1804528
btr	RBCC-B302	ENSTNIG00000011175	ENSTNIP00000014110	Un_random	92114269	92115885
ftr
ftr	RBCC-B302	ENSTNIG00000001084	ENSTNIP00000001070	3	4011004	4015408
ftr82/83like	RBCC-B302	ENSTNIG00000008571	ENSTNIP00000011411	7	2325966	2329441
ftr82/83like	RBCC-B302	ENSTNIG00000008570	ENSTNIP00000011410	7	2332666	2336691
ftr	RBCC-B302	ENSTNIG00000015180	ENSTNIP00000018236	9	2198435	2199916
ftr	RBCC-B302	ENSTNIG00000016037	ENSTNIP00000019126	13	10792965	10796745
ftr	RBCC-B302	ENSTNIG00000010708	ENSTNIP00000013626	14	9795291	9796910
ftr	BCC-B302	ENSTNIG00000008665	ENSTNIP00000011513	17	5614241	5616359
ftr	RBCC-B302	ENSTNIG00000014348	ENSTNIP00000003461 & ENSTNIP00000017365	16	7950459	7953408
ftr82/83like	RBCC-B302	ENSTNIG00000014134	ENSTNIP00000017144 & ENSTNIP00000001953	18	1493524	1495676
ftr82/83like	RBCC-B302	ENSTNIG00000014113	ENSTNIP00000017122	18	1867943	1870519
ftr82/83like	RCC-B302	ENSTNIG00000018810	ENSTNIP00000000527 & ENSTNIP00000021993	18	10652048	10655727
ftr	RBCC-B302	ENSTNIG00000018627	ENSTNIP00000021802	Un_random	20583881	20590128
